# Supplementary material for: Comprehensive methylation analysis of imprinting-associated differentially methylated regions in colorectal cancer
Source: PubMed Central journal article supplement (PMC6278095; doi:10.1186/s13148-018-0578-9), 2018-12-04
Supplement: 13148_2018_578_MOESM1_ESM.pdf [file 13148_2018_578_MOESM1_ESM.pdf]

**Table S1. Information of patients analyzed in this study**

|                                | Right colon cancer | Left colon cancer | Rectal cancer | <i>p</i> value | Statistical method  |
|--------------------------------|--------------------|-------------------|---------------|----------------|---------------------|
| Number of cases                | 35                 | 36                | 35            |                |                     |
| Age at diagnosis (median ± SD) | 68 ± 9.9           | 69.5 ± 10.1       | 69 ± 9.2      | 0.902          | Kruskal-Wallis test |
| Sex (Male : Female)            | 17:18              | 21:15             | 24 :11        | 0.237          |                     |
| AJCC cancer stage              |                    |                   |               |                |                     |
| I                              | 9                  | 6                 | 8             |                |                     |
| II                             | 13                 | 14                | 10            | 0.762          | χ <sup>2</sup> test |
| III                            | 13                 | 16                | 17            |                |                     |
| IV                             | 0                  | 0                 | 0             |                |                     |
| Lymph node metastasis (+)      | 13                 | 16                | 17            |                |                     |
| (-)                            | 22                 | 20                | 18            | 0.620          |                     |
| Pathological type              |                    |                   |               |                |                     |
| Differentiated                 | 34                 | 36                | 34            | 0.547          | Fisher's exact test |
| Poorly                         | 1                  | 0                 | 1             |                |                     |

AJCC, American Joint Committee on Cancer

**Table S2. KRAS mutations identified in 106 CRC tissues.**

| Mutations | Number of tumors | Frequency (%) | Patient ID                                                                     |
|-----------|------------------|---------------|--------------------------------------------------------------------------------|
| G12V      | 16               | 15.1%         | 322, 326, 336, 342, 343, 373, 380, 388, 413, 422, 426, 481, 505, 519, 521, 556 |
| G12D      | 7                | 6.6%          | 275, 316, 361, 410, 444, 464, 558                                              |
| G12S      | 3                | 2.8%          | 321, 330, 534                                                                  |
| G12C      | 3                | 2.8%          | 285, 360, 428                                                                  |
| G12A      | 1                | 0.9%          | 472                                                                            |
| G13D      | 9                | 8.5%          | 313, 341, 374, 419, 456, 473, 478, 484, 557                                    |
| G13C      | 1                | 0.9%          | 311                                                                            |
| G13R      | 1                | 0.9%          | 425                                                                            |
| A59E      | 1                | 0.9%          | 347                                                                            |

**Table S3. Relationship between CIMP and *BRAF* or *KRAS* mutations.**

|                      | CIMP-positive | CIMP-negative | <i>p</i> value | Statistical method  |
|----------------------|---------------|---------------|----------------|---------------------|
| <i>BRAF</i> mut (+)  | 5             | 0             | 0.001          | Fisher's exact test |
| <i>BRAF</i> mut (-)  | 20            | 81            |                |                     |
| <i>KRAS</i> mut (+)  | 11            | 31            |                |                     |
| <i>KRAS</i> mut (-)  | 14            | 50            |                |                     |
| <i>KRAS</i> G13D (+) | 2             | 7             |                |                     |
| <i>KRAS</i> G13D (-) | 23            | 74            |                |                     |

*BRAF* mut: *BRAF* mutation (V600E), *KRAS* mut: all *KRAS* mutations

**Table S4. MAFG consensus binding sites in the iDMRs.**

| DMR                  | Analyzed region <sup>1</sup> | Strand <sup>2</sup> | MAFG consensus binding site <sup>3</sup> | Number of consensus binding sites | Frequency of MAFG consensus binding site per 1 Kb |
|----------------------|------------------------------|---------------------|------------------------------------------|-----------------------------------|---------------------------------------------------|
| <i>PPIEL</i>         | chr1: 40024626-40025540      | -                   | non                                      | 0                                 | 0                                                 |
| <i>ARHI-CG1</i>      | chr1: 68515433-68517545      | -                   | non                                      | 0                                 | 0                                                 |
| <i>ARHI-CG2</i>      |                              |                     |                                          |                                   |                                                   |
| <i>ARHI-CG3</i>      | chr1: 68512505-68513486      | -                   | non                                      | 0                                 | 0                                                 |
| <i>ZDBF2</i>         | chr2: 207114583-207136544    | -1                  | ATAGCGCAGAATCTGCTGAAA                    | 5                                 | 0.23                                              |
|                      |                              | -1                  | AATTTGCTTAGAGAGCATCAG                    |                                   |                                                   |
|                      |                              | 1                   | CTGATGCTCTCTAAGCAAATT                    |                                   |                                                   |
|                      |                              | -1                  | AAAGTGCTGAGTATGTGTTAT                    |                                   |                                                   |
|                      |                              | 1                   | ATAACACATACTCAGCACTTT                    |                                   |                                                   |
| <i>NAP1L5</i>        | chr4: 89618184-89619237      | -                   | non                                      | 0                                 | 0                                                 |
| <i>FAM50B</i>        | chr6: 3849082-3850359        | -1                  | GATGCGCTGCTTCAGCACCTC                    | 2                                 | 1.56                                              |
|                      |                              | 1                   | GAGGTGCTGAAGCAGCGCATC                    |                                   |                                                   |
| <i>ZAC</i>           | chr6: 144328078-144329888    | -1                  | AGATTGCTTACTTAGCACATG                    | 2                                 | 1.10                                              |
|                      |                              | 1                   | CATGTGCTAAGTAAGCAATCT                    |                                   |                                                   |
| <i>GRB10-DMR</i>     | chr7: 50848726-50851312      | -                   | non                                      | 0                                 | 0                                                 |
| <i>PEG10</i>         | chr7: 94285537-94287960      | -                   | non                                      | 0                                 | 0                                                 |
| <i>PEG1</i>          | chr7: 130130122-130134388    | -1                  | CAAATGCTGATTTAGCACCTA                    | 2                                 | 0.47                                              |
|                      |                              | 1                   | TAGGTGCTAAATCAGCATTG                     |                                   |                                                   |
| <i>LOC728024</i>     | chr8: 37604992-37606088      | -                   | non                                      | 0                                 | 0                                                 |
| <i>TRAPPC9</i>       | chr8: 141108147-141111081    | -                   | non                                      | 0                                 | 0                                                 |
| <i>H19promoter</i>   | chr11:2018812-2024740        | -                   | non                                      | 0                                 | 0                                                 |
| <i>H19DMR</i>        |                              |                     |                                          |                                   |                                                   |
| <i>IGF2-DMR2</i>     | chr11: 2153991-2155112       | -                   | non                                      | 0                                 | 0                                                 |
| <i>IGF2-DMR0</i>     | chr11: 2168333-2169768       | -                   | non                                      | 0                                 | 0                                                 |
| <i>KvDMR1</i>        | chr11: 2719948-2722259       | -                   | non                                      | 0                                 | 0                                                 |
| <i>RB1</i>           | chr13: 48892341-48895763     | -                   | non                                      | 0                                 | 0                                                 |
| <i>MEG3</i>          | chr14: 101290524-101293978   | -                   | non                                      | 0                                 | 0                                                 |
| <i>MEG8</i>          | chr14: 101370741-101371419   | -                   | non                                      | 0                                 | 0                                                 |
| <i>MAGEL2</i>        | chr15: 23892425-23894029     | -                   | non                                      | 0                                 | 0                                                 |
| <i>NDN</i>           | chr15: 23931451-23932759     | -                   | non                                      | 0                                 | 0                                                 |
| <i>SNRPN</i>         | chr15: 25200004-25201976     | -1                  | CCTCTGCTGCGTCTGCGCAAC                    | 2                                 | 1.01                                              |
|                      |                              | 1                   | GTTGCGCAGACGCAGCAGAGG                    |                                   |                                                   |
| <i>IGF1R</i>         | chr15: 99408496-99409650     | -                   | non                                      | 0                                 | 0                                                 |
| <i>ZNF597 (3')</i>   | chr16: 3481801-3482388       | -                   | non                                      | 0                                 | 0                                                 |
| <i>ZNF597 (TSS)</i>  | chr16: 3492828-3494463       | -                   | non                                      | 0                                 | 0                                                 |
| <i>ZNF331 (1)</i>    | chr19: 54040510-54042212     | -                   | non                                      | 0                                 | 0                                                 |
| <i>ZNF331 (2)</i>    | chr19: 54057086-54058425     | -                   | non                                      | 0                                 | 0                                                 |
| <i>PEG3</i>          | chr19: 57348493-57353271     | -1                  | GGTTTGCCGAGTAGGCGCTGT                    | 1                                 | 0.21                                              |
| <i>USP29</i>         | chr19: 57629548-57631498     | -                   | non                                      | 0                                 | 0                                                 |
| <i>L3MBTL</i>        | chr20: 42142365-42144040     | -                   | non                                      | 0                                 | 0                                                 |
| <i>NESP55</i>        | chr20: 57414039-57418612     | -1                  | TTTGTGCTGGGTCATCAGAGC                    | 2                                 | 0.44                                              |
|                      |                              | 1                   | GCTCTGATGACCCAGCACAAA                    |                                   |                                                   |
| <i>NESPAS-GNASXL</i> | chr20: 57425649-57428033     | -                   | non                                      | 0                                 | 0                                                 |
| <i>GNAS1A</i>        | chr20: 57463265-57465201     | -                   | non                                      | 0                                 | 0                                                 |
| <i>GNASXL</i>        | chr20: 57428905-57431463     | -                   | non                                      | 0                                 | 0                                                 |
| <i>WRB</i>           | chr21: 40757510-40758276     | -                   | non                                      | 0                                 | 0                                                 |
| <i>NHP2L1</i>        | chr22: 42077774-42078873     | -                   | non                                      | 0                                 | 0                                                 |

<sup>1</sup>The analyzed regions were shown using the UCSC hg19 reference genome.

<sup>2</sup>Forward strand and reverse strand were indicated in 1 and -1, respectively.

<sup>3</sup>MAFG consensus binding site was identified by the JASPAR database. The relative profile score threshold was set at 80%.

**Table S5. *IGF2* imprinting status in paired tumors and normal mucosae.**

|               |     | Tumor |     | <i>p</i> value | Statistical method  |
|---------------|-----|-------|-----|----------------|---------------------|
|               |     | MOI   | LOI |                |                     |
| Normal mucosa | MOI | 4     | 3   | 0.225          | Fisher's exact test |
|               | LOI | 10    | 22  |                |                     |

MOI, maintenance of imprinting; LOI, loss of imprinting

Table S6. Relationship between *IGF2*-DMR2 hypomethylation and *IGF2* LOI in tumors.

|                                       | Number of MOI cases | Number of LOI cases | <i>p</i> value | Statistical method |
|---------------------------------------|---------------------|---------------------|----------------|--------------------|
| <i>IGF2</i> -DMR2 hypomethylation (+) | 5                   | 14                  | 0.326          | $\chi^2$ test      |
| (-)                                   | 9                   | 13                  |                |                    |

MOI, maintenance of imprinting; LOI, loss of imprinting

Table S7. Relationship between clinicopathological factors and HyMiD status.

|                                |                | HyMiD-positive | HyMiD-negative | p value | Statistical method  |
|--------------------------------|----------------|----------------|----------------|---------|---------------------|
| Number of cases                |                | 55             | 51             |         |                     |
| Age at diagnosis (Median ± SD) |                | 70.0 ± 10.0    | 68.0 ± 9.8     | 0.850   | Kruskal-Wallis test |
| Sex                            | Male           | 27/55 (49.1%)  | 35/51 (68.6%)  | 0.032   | Fisher's exact test |
|                                | Female         | 28/55 (50.9%)  | 16/51 (31.4%)  |         |                     |
| Tumor location                 | Right          | 18/55 (32.7%)  | 17/51 (33.3%)  | 0.567   |                     |
|                                | Left           | 21/55 (38.2%)  | 15/51 (29.4%)  |         |                     |
|                                | Rectum         | 16/55 (29.1%)  | 19/51 (37.3%)  |         |                     |
| Pathological type              | Differentiated | 54/55 (98.2%)  | 50/51 (98.0%)  | 0.733   |                     |
|                                | Poorly         | 1/55 (1.8%)    | 1/51 (2.0%)    |         |                     |
| Lymph node metastasis          |                | 22/55 (40.0%)  | 24/51 (47.1%)  | 0.296   |                     |
| Lymphatic invasion             |                | 28/55 (50.9%)  | 27/51 (52.9%)  | 0.494   |                     |
| Vascular invasion              |                | 16/55 (29.1%)  | 16/51 (31.4%)  | 0.482   |                     |
| AJCC cancer stage              | I              | 17/55 (30.9%)  | 6/51 (11.8%)   | 0.053   |                     |
|                                | II             | 16/55 (29.1%)  | 21/51 (41.2%)  |         |                     |
|                                | III            | 22/55 (40.0%)  | 24/51 (47.0%)  |         |                     |
| Tumor size (Median ± SD) (mm)  |                | 45.0 ± 18.6    | 42.0 ± 16.0    | 0.556   | Mann-Whitney U test |
| Survival rate                  |                | 0.992          | 0.876          | 0.453   | Log-rank test       |

AJCC, American Joint Committee on Cancer

Table S8. Relationship between clinicopathological factors and *IGF2-DMR0* hypomethylation.

|                                |                | <i>IGF2-DMR0</i> hypomethylation (+) | <i>IGF2-DMR0</i> hypomethylation (-) | <i>p</i> value | Statistical method  |
|--------------------------------|----------------|--------------------------------------|--------------------------------------|----------------|---------------------|
| Number of cases                |                | 72                                   | 34                                   |                |                     |
| Age at diagnosis (Median ± SD) |                | 69.0 ± 10.2                          | 69.5 ± 8.3                           | 0.572          | Kruskal-Wallis test |
| Sex                            | Male           | 42/72 (58.3%)                        | 20/34 (58.8%)                        | 0.566          |                     |
|                                | Female         | 30/72 (41.7%)                        | 14/34 (41.2%)                        |                |                     |
| Tumor location                 | Right          | 20/72 (27.8%)                        | 15/34 (44.1%)                        | 0.176          |                     |
|                                | Left           | 28/72 (38.9%)                        | 8/34 (23.5%)                         |                |                     |
|                                | Rectum         | 24/72 (33.3%)                        | 11/34 (32.4%)                        |                |                     |
| Pathological type              | Differentiated | 71/72 (98.6%)                        | 33/34 (97.1%)                        | 0.541          | Fisher's exact test |
|                                | Poorly         | 1/72 (1.4%)                          | 1/34 (2.9%)                          |                |                     |
| Lymph node metastasis          |                | 35/72 (48.6%)                        | 11/34 (32.4%)                        | 0.085          |                     |
| Lymphatic invasion             |                | 35/72 (48.6%)                        | 20/34 (58.8%)                        | 0.220          |                     |
| Vascular invasion              |                | 20/72 (27.8%)                        | 12/34 (35.3%)                        | 0.285          |                     |
| AJCC cancer stage              | I              | 17/72 (23.6%)                        | 6/34 (17.6%)                         | 0.080          |                     |
|                                | II             | 20/72 (27.8%)                        | 17/34 (50.0%)                        |                |                     |
|                                | III            | 35/72 (48.6%)                        | 11/34 (32.4%)                        |                |                     |
| Tumor size (Median ± SD) (mm)  |                | 45.0 ± 18.9                          | 42.5 ± 13.8                          | 0.753          | Mann-Whitney U test |
| Survival rate                  |                | 0.72                                 | 0.66                                 | 0.640          | Log-rank test       |

AJCC, American Joint Committee on Cancer



**Table S9. Relationship between clinicopathological factors and *IGF2* LOI.**

|                                |                | LOI       | MOI        | <i>p</i> value | Statistical method  |
|--------------------------------|----------------|-----------|------------|----------------|---------------------|
| Number of cases                |                | 25        | 14         |                |                     |
| Age at diagnosis (Median ± SD) |                | 69        | 69         | 0.510          | Kruskal-Wallis test |
| Sex                            | Male           | 12 (48 %) | 6 (42.9 %) | 0.511          | Fisher's exact test |
|                                | Female         | 13 (52 %) | 8 (57.1 %) |                |                     |
| Tumor location                 | Right          | 8 (32 %)  | 5 (35.7 %) | 0.458          |                     |
|                                | Left           | 7 (28 %)  | 6 (42.9 %) |                |                     |
|                                | Rectum         | 10 (40 %) | 3 (21.4 %) |                |                     |
| Pathological type              | Differentiated | 10 (40 %) | 6 (42.9 %) | 0.563          |                     |
|                                | Poorly         | 15 (60 %) | 8 (42.9 %) |                |                     |
| Lymph node metastasis          |                | 10 (40 %) | 5 (35.7 %) | 0.534          |                     |
| Lymphatic invasion             |                | 12 (48 %) | 8 (57.1 %) | 0.416          |                     |
| Vascular invasion              |                | 8 (32 %)  | 5 (35.7 %) | 0.542          |                     |
| AJCC cancer stage              | I              | 6 (24 %)  | 3 (21.4 %) | 0.915          |                     |
|                                | II             | 9 (36 %)  | 6 (42.9 %) |                |                     |
|                                | III            | 10 (40 %) | 5 (35.7 %) |                |                     |
| Tumor size (Median ± SD) (mm)  |                | 40 ± 16.9 | 46 ± 12.1  | 0.217          | Mann-Whitney U test |
| Survival rate                  |                | 0.74      | 0.92       | 0.218          | Log-rank test       |

LOI: loss of imprinting, MOI: maintenance of imprinting, AJCC: American Joint Committee on Cancer

Table S10. Primers used in this study.

| Analysis                           | Name of iDMR or gene | Primer name                                        | Primer sequence                                                                              | Location (GRCh37/hg19)           | Total number of CpG sites | Number of analyzed CpG sites |  |
|------------------------------------|----------------------|----------------------------------------------------|----------------------------------------------------------------------------------------------|----------------------------------|---------------------------|------------------------------|--|
| Bisulfite-pyrosequencing for iDMRs | <i>PPIEL</i>         | PPIEL F<br>PPIEL R<br>PPIEL S                      | Bio-GTTTAGGATGAGTAGGGTTATGGG<br>ACCCCTTCTTTCCTTAATCT<br>CTAATACCCAATAAATAAAACAC              | Chr 1 : 40,024,626-40,025,540    | 5                         | 5                            |  |
|                                    | <i>ARHI-CG1</i>      | ARHI-CG1 F<br>ARHI-CG1 R<br>ARHI-CG1 S             | AACTCCCTCTAACTTCTTCTCCCTTACCT<br>Bio-GTTTATAGGTATTGTTGTTAAAAATTTGT<br>CTTCTCCCTTACCTAT       | Chr 1 : 68,510,575-68,510,716    | 4                         | 4                            |  |
|                                    | <i>ARHI-CG2</i>      | ARHI-CG2 F<br>ARHI-CG2 R<br>ARHI-CG2 S             | TGGATTAGTTTTAGATTGTTGTAGATGT<br>Bio-CCCCAAAACCTACTCCTCC<br>GGTTAGTTTTTATAGTTGGT              | Chr 1 : 68,511,601-68,511,797    | 3                         | 3                            |  |
|                                    | <i>ARHI-CG3</i>      | ARHI-CG3 F<br>ARHI-CG3 R<br>ARHI-CG3 S             | AGTTTTGGTTTTAAGGAATAGAAGT<br>Bio-AACCCAACAACATAACAATAATTTTCA<br>AAGTTTTATAGGAAGATTAGAG       | Chr 1 : 68,515,139-68,515,364    | 5                         | 5                            |  |
|                                    | <i>ZDBF2</i>         | ZDBF2 F<br>ZDBF2 R<br>ZDBF2 S                      | GGTTTTAAATGATTTTTGGGTAGTTTG<br>Bio-CCCCTAATAACTTTTACTAATCTCTCT<br>GATTTTTGGGTAGTTTG          | Chr 2 : 207,125,719-207,125,922  | 3                         | 3                            |  |
|                                    | <i>NAP1L5</i>        | NAP1L5 F<br>NAP1L5 R<br>NAP1L5 S                   | AGGGTAGTAATAGGAGGAATTTGGTGTAGT<br>Bio-AAAACCCAACCTCAAACCTAAAAAAC<br>GGGAGTTTTTTAGATTT        | Chr 4 : 89,618,184-89,619,237    | 4                         | 4                            |  |
|                                    | <i>FAM50B</i>        | FAM50B F<br>FAM50B R<br>FAM50B S                   | GGGTTTTGAGGAGAGTGTTAGG<br>Bio-ACCAAAAACCCCTCCTCAAACATC<br>GGAAATAGGAAGTGGAG                  | Chr 6 : 3,849,403-3,849,577      | 3                         | 3                            |  |
|                                    | <i>ZAC</i>           | ZAC F<br>ZAC R<br>ZAC S                            | ACCTTAACTTTACCCCCAC<br>Bio-GGTTGAATGATAAATGGTAGATGT<br>AACCTCCTCTACCA                        | Chr 6 : 144,317,462-144,317,725  | 7                         | 7                            |  |
|                                    | <i>GRB10-DMR</i>     | GRB10 F<br>GRB10 R<br>GRB10 S                      | GTTAGGTTTTGGAGTATAATAGGAATT<br>Bio-AATTACCATAAAAACCAAAAATCC<br>GAATTTTAGGATTAATTTATGTGA      | Chr 7 : 50,848,726-50,851,312    | 6                         | 6                            |  |
|                                    | <i>PEG10</i>         | PEG10 F<br>PEG10 R<br>PEG10 S                      | TTGGTTTAGGTGTGGGATTTT<br>Bio-AAACATTCTAAAATACTACTCCATCTC<br>AGGTGTGGGATTTTATTT               | Chr 7 : 94,285,537-94,287,960    | 5                         | 5                            |  |
|                                    | <i>PEG1 (MEST)</i>   | PEG1 F<br>PEG1 R<br>PEG1 S                         | GTGGTTAGGAGTTTGGTATGTTGA<br>Bio-AAACCCACCACCAAACTAAT<br>GTTGTTGTAAGGAAATTT                   | Chr 7 : 130,130,122-130,134,388  | 6                         | 5                            |  |
|                                    | <i>LOC728024</i>     | LOC728024 F<br>LOC728024 R<br>LOC728024 S          | GGTATGGTTTTTAGGAGTAATTTGA<br>Bio-AACCTATAACCCCTAAACTAATAACTT<br>GAAAAATTTAAGTAAAGAAGAGGG     | Chr 8 : 37,604,992-37,606,088    | 8                         | 7                            |  |
|                                    | <i>TRAPPC9</i>       | TRAPPC9 F<br>TRAPPC9 R<br>TRAPPC9 S                | Bio-TTTTGTGGTAGGGTTGTGT<br>TCATCCTCAAACCCATATCACC<br>AAACCTAAATACAAAATCC                     | Chr 8 : 141,108,147-141,111,081  | 4                         | 4                            |  |
|                                    | <i>H19-promoter</i>  | H19-Promoter F<br>H19-Promoter R<br>H19-Promoter S | GTTTTGGGAGAGTTTGTGAGG<br>Bio-CCCCAAACCCATTCCCATCCAATTAAC<br>GTTTATAGTTTGTAGTAGAGTG           | Chr 11 : 2,015,729-2,015,932     | 4                         | 4                            |  |
|                                    | <i>H19-DMR</i>       | H19DMR F<br>H19DMR R<br>H19DMR S                   | TGGGTATTTTTGGAGGTTTTTTT<br>Bio-ATAAATATCCTATTTCCAAATAA<br>GTTYGGGTTAATTAAGTTA                | Chr 11 : 2,019,871-2,024,740     | 4                         | 4                            |  |
|                                    | <i>IGF2-DMR2</i>     | IGF2-DMR2 F<br>IGF2-DMR2 R<br>IGF2-DMR2 S          | Bio-GGTTTTGGGTGGGTAGAGT<br>CCCCAAATCCCCCTAAACAAATCTTC<br>CCTACCTACCCTCCT                     | Chr 11 : 2,153,991-2,155,112     | 5                         | 5                            |  |
|                                    | <i>IGF2-DMR0</i>     | IGF2-DMR0 F<br>IGF2-DMR0 R<br>IGF2-DMR0 S          | TGAGGATGGGTTTTGTTGGTAT<br>Bio-TCCTCAATCCACCAAAATAATAT<br>AAAAGTTATGGATATAGT                  | Chr 11 : 2,168,333-2,169,768     | 3                         | 3                            |  |
|                                    | <i>KvDMR1</i>        | KvDMR1 F<br>KvDMR1 R<br>KvDMR1 S                   | AGGGAAGTTTTAGGGTGTGAATTTTTAGAG<br>Bio-CCAAACCACCACCTAACAAAAAAC<br>TGGTAATGTTTGGTATTT         | Chr 11 : 2,719,948-2,722,259     | 6                         | 6                            |  |
|                                    | <i>RB1</i>           | RB1 F<br>RB1 R<br>RB1 S                            | GGTAGGGTAGTTTTGGAATGTTAAG<br>Bio-AACCACAAACCCCTTACCC<br>AGTTTTGGAATGTTAAGAT                  | Chr 13 : 48,892,341-48,895,763   | 6                         | 6                            |  |
|                                    | <i>MEG3</i>          | MEG3-CG7 F<br>MEG3-CG7 R<br>MEG3-CG7 S             | GTTAGGTAGGGTGAATTTAGGTATAATGTGTG<br>Bio-AACAACCTCTAACTTACATCTAAAACCAATT<br>ATGGTTAAGGTGGGTTG | Chr 14 : 101,290,524-101,293,978 | 7                         | 7                            |  |
|                                    | <i>MEG8</i>          | MEG8 F<br>MEG8 R<br>MEG8 S                         | GAGGGGGATAGTTAAGAGGGA<br>Bio-ACAACCTCCCCAACCTACTACTATTACA<br>TTGGTAGAGGAGTTTTAATTG           | Chr 14 : 101,370,741-101,371,419 | 7                         | 7                            |  |
|                                    | <i>MAGEL2</i>        | MAGEL2 F<br>MAGEL2 R<br>MAGEL2 S                   | GTTAATTGGAGGTGGATTTAAGG<br>Bio-AAACAACCACCTAAACATCTCTCTCTC<br>GAATAGTAGGGAGTTATAGATAGG       | Chr 15 : 23,892,425-23,894,029   | 5                         | 5                            |  |
|                                    | <i>NDN</i>           | NDN F<br>NDN R<br>NDN S                            | GTAGGGTTTTGAGTTTAGGAGTTTTT<br>Bio-AATCCCTCTCCCAACAAATAAACCTC<br>GATTTTTGGAGAGGAAG            | Chr 15 : 23,931,451-23,932,759   | 7                         | 6                            |  |
|                                    | <i>SNRPN</i>         | SNRPN F<br>SNRPN R<br>SNRPN S                      | GGGAGGGAGTTGGGATTTTTG<br>Bio-AAACCCACCCACACAACCTTACCC<br>AGTTGGGATTTTTGTATTG                 | Chr 15 : 25,200,004-25,201,976   | 7                         | 7                            |  |
|                                    | <i>IGF1R</i>         | IGF1R F<br>IGF1R R<br>IGF1R S                      | Bio-TAAGGAGGGTTGGTTGGAG<br>AACCCCACTCCCTTTCTAT<br>CCCAACCTAACCTAAAACCAC                      | Chr 15 : 99,408,496-99,409,650   | 6                         | 6                            |  |
|                                    |                      | ZNF597(2) F                                        | ATGTAGTGGATATGGTTAGGTATATG                                                                   |                                  |                           |                              |  |

|                                                         |               |                                                       |                                                                                      |                                |   |   |
|---------------------------------------------------------|---------------|-------------------------------------------------------|--------------------------------------------------------------------------------------|--------------------------------|---|---|
|                                                         | ZNF597 (3')   | ZNF597(2) R<br>ZNF597(2) S                            | Bio-ATCTCCAACCTAACCACTA<br>ATAGTTTATTTGTTTAGGAATG                                    | Chr 16 : 3,481,801-3,482,388   | 5 | 5 |
|                                                         | ZNF597 (TSS)  | ZNF597 F<br>ZNF597 R<br>ZNF597 S                      | GGAGGGGGTTAGGTAGAG<br>Bio-ATCCCTTAAAAAATCTCTCC<br>AGGTATTAGATTATTTGGGTT              | Chr 16 : 3,492,828-3,494,463   | 5 | 5 |
|                                                         | ZNF331 (pro)  | ZNF331 F<br>ZNF331 R<br>ZNF331 S                      | Bio-AGGGATTAGGAAGGTTAGT<br>CCCAAACCCCTATTCCAACATAACAAC<br>CCCAAACAAAAACCTC           | Chr 19 : 54,040,510-54,042,212 | 5 | 5 |
|                                                         | ZNF331 (int)  | ZNF331(2) F<br>ZNF331(2) R<br>ZNF331(2) S             | GTTGGGTGAGGAGGTTTT<br>Bio-CCCCATCACCCCAATAA<br>GGTGAGGGAGGTTTTTT                     | Chr 19 : 54,057,086-54,058,425 | 5 | 5 |
|                                                         | PEG3          | PEG3 F<br>PEG3 R<br>PEG3 S                            | GGTGGTTTTAGGTTAGTAGAAAGG<br>Bio-ACCAAATAATAATAATACCTTTT<br>AGATTTGTAGTAGTTTTTAGATT   | Chr 19 : 57,348,493-57,353,271 | 5 | 5 |
|                                                         | USP29         | USP29 F<br>USP29 R<br>USP29 S                         | TTTTAGAGGGAGAGATGGAAGTTGG<br>Bio-ACCACAAACCCCAATCTTAAAAA<br>TGATTGATTTGGGTTT         | Chr 19 : 57,629,548-57,631,498 | 6 | 6 |
|                                                         | L3MBTL        | L3MBTL-CG3 F<br>L3MBTL-CG3 R<br>L3MBTL-CG3 S          | TATGAGGAGAAGAGGGTTATGGTAT<br>Bio-AAAACCAACTCAAACCTAAAAAC<br>GGGAGTAGTAATTTTAGATTTTTT | Chr 20 : 42,142,365-42,144,040 | 5 | 5 |
|                                                         | NESP55        | NESP55 F<br>NESP55 R<br>NESP55 S                      | TTTTTTTTGGGGTTTTGGGGTTTTT<br>Bio-AACAAACCTTAAACTATCCCTCCC<br>TGGAGTGTTGGGTATTA       | Chr 20 : 57,414,039-57,418,612 | 7 | 7 |
|                                                         | NESPAS-GNASXL | NESPAS-GNASXL F<br>NESPAS-GNASXL R<br>NESPAS-GNASXL S | GGATATGGGTGGGAGGTTTAA<br>Bio-CCCTAAACCCACCTCTC<br>GGGTGGGAGGTTTAATA                  | Chr 20 : 57,425,649-57,428,033 | 5 | 5 |
|                                                         | GNAS1A        | GNAS 1A F<br>GNAS 1A R<br>GNAS 1A S                   | TGTTGAAGATGGTTATGAAGTTTAAAGTT<br>Bio-TATCCCAATCAACCCAAACCTACTC<br>AAGTTTAGGAGGAGGTT  | Chr 20 : 57,463,265-57,465,201 | 8 | 8 |
|                                                         | GNASXL        | GNASXL F<br>GNASXL R<br>GNASXL S                      | ATGAAGGGGTGGTTAGTAG<br>Bio-CTCCCCAAAATACCTTCTAACCTT<br>GGATGTTTTAGTTGGTTTTAGTA       | Chr 20 : 57,428,905-57,431,463 | 6 | 6 |
|                                                         | WRB           | WRB F<br>WRB R<br>WRB S                               | TTGGAGGGGGTTGAGGGTTTA<br>Bio-TACCAATCCTAAACACCTATACAATAC<br>GGGTTGAGGGTTTAT          | Chr 21 : 40,757,510-40,758,276 | 5 | 5 |
|                                                         | NHP2L1        | NHP2L1 F<br>NHP2L1 R<br>NHP2L1 S                      | Bio-GGATGTTTAGTTTTAAGTAGGAAGTG<br>CCCAACCCCTCTCCTTTAA<br>CCTAATATACCAACTAACCTAA      | Chr 22 : 42,077,774-42,078,873 | 4 | 4 |
| Bisulfite-pyrosequencing for CIMP markers               | hMLH1         | hMLH1 F<br>hMLH1 R<br>hMLH1 S                         | TTGATTGGTATTAAAGTTGTTAATT<br>Bio-CCAATCTCAATCATCTCTTAAATA<br>AGTTATAGTTGAAGGAAGAA    | Chr 3 : 37,034,823-37,107,380  | 3 | 3 |
|                                                         | MINT1         | MINT1 F<br>MINT1 R<br>MINT1 S                         | GGTTTTTGTAGYGTITGTATT<br>Bio-ATTAATCCCTCTCCCTCTAAACTT<br>TTTAGTAAAAATTTTTGGG         | Chr 5 : 75,378,997-75,649,764  | 3 | 3 |
|                                                         | MINT2         | MINT2 F<br>MINT2 R<br>MINT2 S                         | AGTGTAGAAAAATGTGTTG<br>Bio-CTACAATTAAACATCAATTATAT<br>GAATTTAGTATTTAAGTT             | Chr 2 : 58,654,934-59,290,901  | 3 | 3 |
|                                                         | MINT31        | MINT31 F<br>MINT31 R<br>MINT31 S                      | GTTTAGGGGTGATGTTTTAGT<br>Bio-AAAACACTTCCCAACATC<br>GGTGATGGAGGTTAT                   | Chr 17 : 48,633,568-48,639,469 | 4 | 4 |
|                                                         | p16           | p16 F<br>p16 R<br>p16 S                               | GGTTGTTTTYGGTTGGTGT<br>Bio-ACCCTATCCCTCAAATCCTCTAAAA<br>GGAGTTAATAGTATTTTT           | Chr 9 : 21,967,751-21,995,300  | 4 | 4 |
| Bisulfite-pyrosequencing for LINE-1 methylation         | LINE-1        | LINE-1 F<br>LINE-1 R<br>LINE-1 S                      | TTTTGAGTTAGGTGTTGGATATA<br>Bio-AAATCAAAAAATCCCTTTC<br>AGTTAGGTGTTGGATATAGT           |                                | 4 | 4 |
| KRAS mutation analysis                                  | KRAS exon2    | KRAS F1<br>KRAS R1                                    | GGTGAGTTTGTATTAAGGTTACTGG<br>CCTTTATCTGTATCAAGAATGGTC                                |                                |   |   |
|                                                         | KRAS exon3    | KRAS F2<br>KRAS R2                                    | CCAGACTGTGTTTCTCCCTTC<br>GCATGGCATTAGCAAAGACTC                                       |                                |   |   |
| Pyrosequencing for BRAF (V600E) mutation analysis       | BRAF          | BRAF F<br>BRAF R<br>BRAF S                            | ATGCTTGCTCTGATAGGAA<br>Bio-GCATCTCAGGGCCAAA<br>GGTGATTTGGTCTAGCTAC                   |                                |   |   |
| Genotyping of IGF2 (rs680)                              | IGF2          | IGF2 P2-2<br>IGF2 P5-2                                | GGACTTTGAGTCAAATTGGC<br>GGGTTGTTGCTATTTTCGGA                                         |                                |   |   |
| Genotyping of H19 (rs2839702)                           | H19           | H19 331<br>H19 332                                    | CGGACACAAAACCTCTAGCTTGAAATGA<br>AATGGAATGCTTGAAGGCTGCTCCGT                           |                                |   |   |
| Pyrosequencing for allelic-specific expression analysis | IGF2          | IGF2-allele F<br>IGF2-allele R<br>IGF2-allele S       | Bio-GGACTTTGAGTCAAATTGGC<br>GGGTTGTTGCTATTTTCGGA<br>GTGCCACCTGTGATTTCTG              |                                |   |   |
|                                                         | H19           | H19-allele F<br>H19-allele R<br>H19-allele S          | Bio-CGGACACAAAACCTCTAGCTTGAAATGA<br>GCGCTGCTGTTCCGATGGTG<br>GGCTGATGAGGCTGGTTCC      |                                |   |   |

F: forward primer, R: reverse primer, S: sequence primer, Bio: biotinylated primer

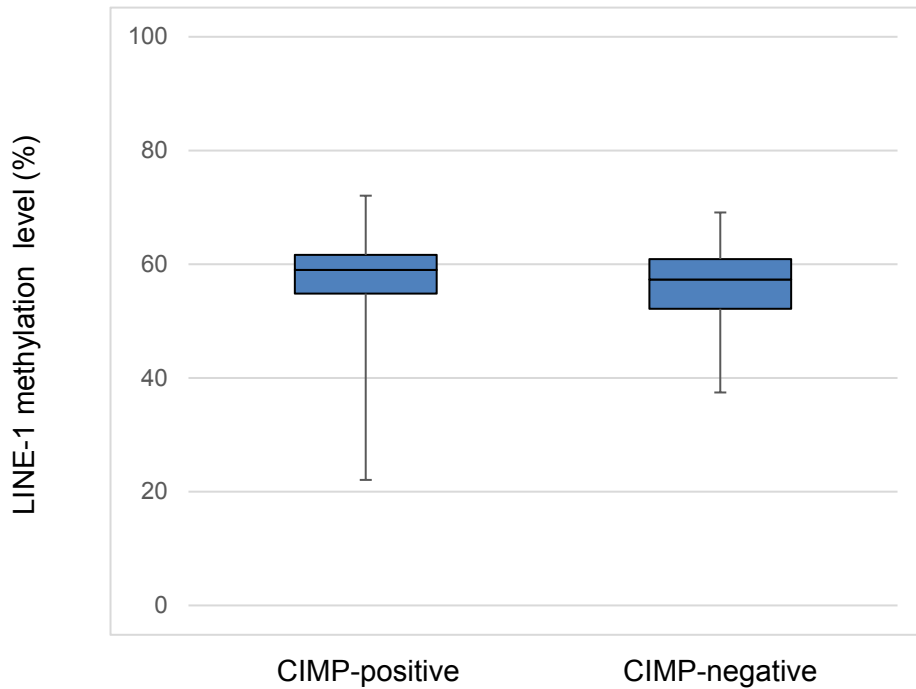

**Figure S1. Non-relationship between CIMP status and LINE-1 methylation.**

LINE-1 methylation in CIMP-positive tumors (median: 59.0%, ranging from 22.1 to 72.1%) was not significantly different from that in CIMP-negative tumors (median: 57.3%, ranging from 37.5 to 69.1%) ( $p = 0.235$ , Mann-Whitney U test).
